# Supplementary material for: Construction of a High-Density Genetic Map and Identification of Quantitative Trait Loci for Nitrite Tolerance in the Pacific White Shrimp (Litopenaeus vannamei)
Source: Front Genet. 2020 Sep 24;11:571880. doi: 10.3389/fgene.2020.571880 (PMC7541944; doi:10.3389/fgene.2020.571880)
Supplement: Supplementary file 7 [file Table_7.XLSX]

## Sheet: Sheet1
Supplementary Table S7. Basic information for the markers within QTL.
Markers within QTLs	Genetic distance of marker in linkage group (CM)	Marker's position in the Litopenaeus vannamei genome (Genome fragment/start position)	NCBI Accession	Marker sequence
QTL1	LG23
Marker7427004	67.871	ASM378908v1 LVANscaffold_2426/160522	NW_020869872.1	GGACTGTAGAATCCAAACCACTCGCTCTCAGGAGGGACAACCATGGAATCCTCCTCAAACTTGACCATGACAAAGTTCTCCAGCTTTTTGAGGTTTTCACXXXXXXXXXXAATTAATGCCATAAATATCAAACCTCTGCATTATTGATGTCCGCCAGGAAAATGGATGCATTGCGGTATTCATTTTCATGGAGGGGATCATGCCAATACT
Marker1566954	68.255	ASM378908v1 LVANscaffold_2278/67475	NW_020869707.1	CAGATGTTGGTGCTTGATTAATGGAGAGTGTGGGATTCATGGACATGTTGCCCTTCTGATTCAGATGTTAGTGTGTCATGATTTTTAGAATCACTTTGTTXXXXXXXXXXTTATACGTGTTGCTAGCTATATTATTGTCGATTTCCTTTGTTTTGTTTTACTTGTTGCTCATTTCTTTTGCTTTGTTTTTTCTATGCAATGCGAAGGAGT
Marker5692702	68.639	ASM378908v1 LVANscaffold_1923/268581	NW_020869313.1	GACTGATAATTCTTTGTAGAGGGGTTTGTACTGTCTGCAATTAAACATATCATTTTAGTAAAAGGAGGACATGAACATGAGCATACTAAAAGTACTTTTAXXXXXXXXXXGAATAGGTGACAAATGCAGAAAGCTCATTTAATCTTTATAAATATTCACAAATTTTGGTTTCCATTCTAGGGATGAAATAACTGGAAGTTATCAAAGCAT
Marker3096025	69.368	ASM378908v1 LVANscaffold_759/354648	NW_020872701.1	CTGAAAAGAGGATTTGATTTTTAAAGGCAATAAATGACTCGTGATATAACATTTTGTTGAAATATCTACATATTGTTTTATCAAAAAAGATAAAGCAATCXXXXXXXXXXTAATACTACAACATTACCATAGGTATAGTAACTACTGCCTCTCTTACCTCTCTCAAATGTGTCTTTGTGATAAGATGTCGTCTCAACGATGCCTTTTTGA
Marker10180133	69.411	ASM378908v1 LVANscaffold_2991/299467	NW_020870499.1	ATCCAAAATGCAAAAATTTCTGTAAAGAGCTTTGTAGATGGAAAAATAAAAAAATACATATCTCTGCTCCTTTGATATCTGTTCCCATAAAATATTTTCAXXXXXXXXXXCTGTATTCATTTCCTGGCATTATTACACTGAACAGCATGAACAGAAAATATTTACTTTTAGTACAAAAGTTCTCAGTCCTAATTATGATCCTTTCCATCT
Marker648773	69.795	ASM378908v1 LVANscaffold_2081/541845	NW_020869489.1	TCATACTCTGCCATTTTGCTTTCTATTCTTTTAATTAACCTACCTACCTAATCCCCCCCAATCCCTTGCTCGTTTTTGTAGTAGGGGGGGAAAGCTCGGAXXXXXXXXXXGTTAAGAAGGAATGCGAAGATAGAAAATCATCGGCTATTTGCATAGTAAAAACATATTAGTTGATCCTTACATTACAATCTCGGATGGCAATCTATTTCA
Marker5695830	70.179	ASM378908v1 LVANscaffold_1923/345222	NW_020869313.1	CTACCCTGAGGAACCCCAGAAGACACATGGGAATACAAGCTAAAACTACAATCAACATGAACACACTGCTGCCTACCTATGTAAAATTCAGTTAAGATACXXXXXXXXXXTGCATCATTGTGCTACTTTCCTTAATTCCCTGAAATGCTCAAAAACTTGCATACCATAGATGTCATGTGAGTGCCATCTACATATGTACAGCCATCTAAT
Marker6565958	70.952	ASM378908v1 LVANscaffold_2139/728868	NW_020869553.1	ACGGCTGCACTCGGTCTCTGTGCGCCACTTACCCATGATTAATTTACTGATCCATGTTTGTGGGGGACTGTATTGATGAAGGGACGGCGTTATTCAGCGTXXXXXXXXXXCTGGGTCATATATGCTGTGGATTGACTATCTTTTTCGCTTTCAAATTAATGTCAAGGGCTGATGATATAACGACCTCTTTTTGTGTGGGTCATTTTGTGT
Marker652457	71.725	ASM378908v1 LVANscaffold_2081/539337	NW_020869489.1	CAAATCTTAAAATGATGTGTTTGAGTAAATCAGTTGTACCTATTACCCAACACAATTTTGTTGATGAGGTGCCTGTGACTTTCCACTGGCTTTGTAACATXXXXXXXXXXCAGGGGTATGTTATTCCTTTGGTTAATTGCTTAACCCCTTACCCCCATACGAGGACCCAGAGGGTTAAACTGATTTTCCCCATTAATTTCAAGATCGCCA
Marker6147206	72.497	ASM378908v1 LVANscaffold_1464/550239	NW_020868803.1	CTTTTTAAAGAGAGTCAGGGAGAGGGCAATACCTGATATCACACATTCATTTCCTCCAGTGCAATGAATTTCATCAACATTTTTGCAATTATGCTGTCAAXXXXXXXXXXTTGTTATCGGTAACAGCGTGGAGCATCTGGCTGCCTTCCTCTCCCACCCACTGCATGAGGTCTCCACATTCCACTACTGTTGGGATGTTGTAGCCGTGTT
Marker8125818	73.297	ASM378908v1 LVANscaffold_1694/104446	NW_020869058.1	CCGCTCTGACATCCGAATTATGATAAATTATTTGAAACCCTTATTATAGTCGCGAATTTTCCTGTGAGAGAGAATGCTTTTGTGTTTGCTTGTTTATGGAXXXXXXXXXXTATCTTTTATTTTTGTTAGTCATTTGTTTGTTTGTTTGTTTTTGTTTGTATGAGTGTTCTTTCTTTTTGTTATTAATCTTTTCCTATTTACCCTCTTTTT
Marker6149151	73.815	ASM378908v1 LVANscaffold_1464/594747	NW_020868803.1	GTAGGAGACAGTGAGTCGTAGAAACAGTAATATCGACACCTATTATCAGACTTAAGAGATTTGCAGTTGCTTTCAGTTTGTGGTTTGGTTCCAGGAGAGAXXXXXXXXXXTATATCATTAAGTTTGAAGTATAAAATGAGGGAGACATATTTGCGAAAACTGGTACCATACAGATTTTTTATATGACACAAAAGGAAGTTGCGATTGATG
Marker3831340	76.039	ASM378908v1 LVANscaffold_1389/408568	NW_020868719.1	TTAACATTATTCCCATAAAAAAATTCTAGCTTTTGTCAGTCCATCATTATGTCTCTTATACATTACTGATTACACTAGTGGTATATACTACTGGAAAGAAXXXXXXXXXXGTGACAATATTCATAGAATCCACAACTATTTTCAATGCACAATTCATCCAGTTTATTATTGACTGCTGTGATATTTTTCTATAGAGGACACTGTCTGGTG
Marker2332790	77.206	ASM378908v1 LVANscaffold_2864/200246	NW_020870358.1	TCTTAATGCAAGTGAAAAATGTCTTTACAGCAAGTGATTTCAAATTTTGTATTCATTTTTGCTCTTATCAACAGATGGTGCTCCTTGTGGCTACGTCTATXXXXXXXXXXTATAAATGATCTACAATTCAATTAATTCTAATTAGTTTTGGTTAGTACTACTGGTTTTAGTTCCATAGTTTTGGGTTTATTTTAACATGCACTTTCTTGT
Marker3423397	77.591	ASM378908v1 LVANscaffold_1187/63616	NW_020868495.1	CATGATGGTAGTGCCACCTAGCGTGTATGGCACCAAGTTCGCGGAGACGGCACCAACCATCACTAGATAGACTGCAACACTCATTTTGATCAAACTTATTXXXXXXXXXXCAAGCACGAGCCGCGAGCACTGAAAGAGGAGCTGCCGCCTCGCTCGCGCTGCTGCCAGGACGCGCTCCAACGAACGACTGAGCCGAGGGGCGGCGATCAT
QTL2	LG44
Marker901901	91.347	ASM378908v1 LVANscaffold_2484/392039	NW_020869936.1	TATCTATCCCTTTAAAATCGTCTATTCATTCATATCATTCTTTAGCTAAGTTTTTTTATCCATTTTTTTATTAACTTATCTAACTAGCAATTTATCTATTXXXXXXXXXXCGCACTCTTTCCAAACACACCCACACCGCTGCATATTCATCCATACAATTCGACGTTAGAGACCCTCGGCGGCGGTGCAATAAAAATGTAAAAGAACACC
Marker11998450	93.512	ASM378908v1 LVANscaffold_1765/57002	NW_020869137.1	CTGGCGTAGAATGAAACAAAGTACTAATCAGGTTCTTTGTACTTTCTTCCAGTCAGTTGCAAAGCGAATATGCAAAAGAAAAATATTGAAAAGAAATCAAXXXXXXXXXXACATAAGAGTTCATATGCAAATAACATATTCCATTTGATATTCTTTCATGTACATAAAGTCCTGAATTCGTTCGTAACTCACCAACTCAATAAATTCTTG
